# Supplementary material for: Diagnostic outcomes of exome sequencing in patients with syndromic or non-syndromic hearing loss
Source: PubMed Central journal article supplement (PMC5749682; doi:10.1371/journal.pone.0188578), 2018-01-02
Supplement: pone.0188578.s002.pdf [file pone.0188578.s002.pdf]

| <b>Proband ID</b> | <b>Family history</b> | <b>Hearing loss</b>                                      | <b>Other features</b>                                                                                                                                                          |
|-------------------|-----------------------|----------------------------------------------------------|--------------------------------------------------------------------------------------------------------------------------------------------------------------------------------|
| P794              | Spor                  | Progressive bilateral, mixed HL; SNHL component profound | External, middle and inner ear anomalies, myopia, bilateral retinal coloboma, hypothyroidism, coeliac disease                                                                  |
| P152              | Spor                  | Moderate bilateral SNHL                                  | Global developmental delay, seizures, microcephaly, dysplastic facial features, fingers and toes syndactyly                                                                    |
| P045              | Fam                   | Severe bilateral SNHL                                    | Unilateral heterochromia, dorsiflexion of 2nd toes                                                                                                                             |
| P584              | Spor                  | Mild to moderate bilateral SNHL                          | Delayed motoric milestones, difficulties in walking, progressive distal weakness of the lower and upper limbs, cerebellar dysfunction, peripheral motor and sensory neuropathy |
| P144              | Spor                  | Mild bilateral SNHL                                      | Congenital arthrogyrosis, delayed motoric milestones, severe scoliosis                                                                                                         |
| P552              | Spor                  | Moderately severe bilateral conductive HL                | Malar hypoplasia, micrognathia, thumb hypoplasia, radioulnar synostosis                                                                                                        |
| P555              | Fam                   | Moderately severe bilateral SNHL                         | Both parents are hearing impaired, father also has RP along with some of his other close relatives                                                                             |
| P314              | Spor                  | Moderately severe bilateral SNHL                         | Microphthalmia, solitary kidney, omphalocele, dysplastic facial features; normal growth and development                                                                        |
| P852              | Fam                   | Moderate bilateral SNHL                                  | Retinitis pigmentosa                                                                                                                                                           |
| P506              | Fam                   | Severe bilateral SNHL                                    | Severe developmental delay, cerebellar hypoplasia (vermis and hemispheres)                                                                                                     |
| P654              | Spor                  | Severe bilateral SNHL                                    | Intestinal atresia type IIIa, unilateral hydronephrosis, developmental delay                                                                                                   |
| P554              | Spor                  | Moderate bilateral SNHL                                  | Intellectual disability, autism, seizures, scoliosis, bronchogenic cyst of the neck                                                                                            |
| P052              | Spor                  | Moderately severe bilateral conductive and SNHL          | Aural atresia                                                                                                                                                                  |
| P652              | Spor                  | Moderate unilateral conductive and SNHL                  | Developmental delay, dysplastic facial features, choroidal coloboma, amblyopia, Dandy Walker malformation                                                                      |
| P352              | Fam                   | Profound bilateral SNHL                                  | Hypopigmentation of hair                                                                                                                                                       |
| P952              | Spor                  | Moderate unilateral conductive HL                        | Developmental delay, on the right side microtia (third degree), anophthalmia, and facial nerve paralysis, agenesis of corpus callosum                                          |
| P752              | Spor                  | Severe bilateral SNHL                                    | Developmental delay, tracheoesophageal fistula, synostosis of the 5th and 6 <sup>th</sup> rib on the right side, unilateral cryptorchidism                                     |
